# Supplementary material for: Complementary Immunometabolic Effects of Exercise and PPARβ/δ Agonist in the Context of Diet-Induced Weight Loss in Obese Female Mice
Source: PubMed Central journal article supplement (PMC6829333; doi:10.3390/ijms20205182), 2019-10-19
Supplement: ijms-20-05182-s001.pdf [file ijms-20-05182-s001.pdf]

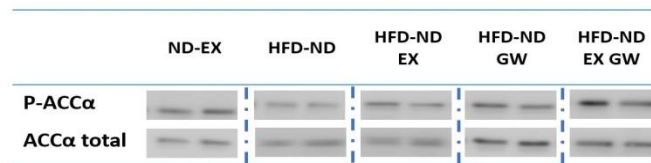

2-way ANOVA: treatment x exercise ( $p < 0.05$ )

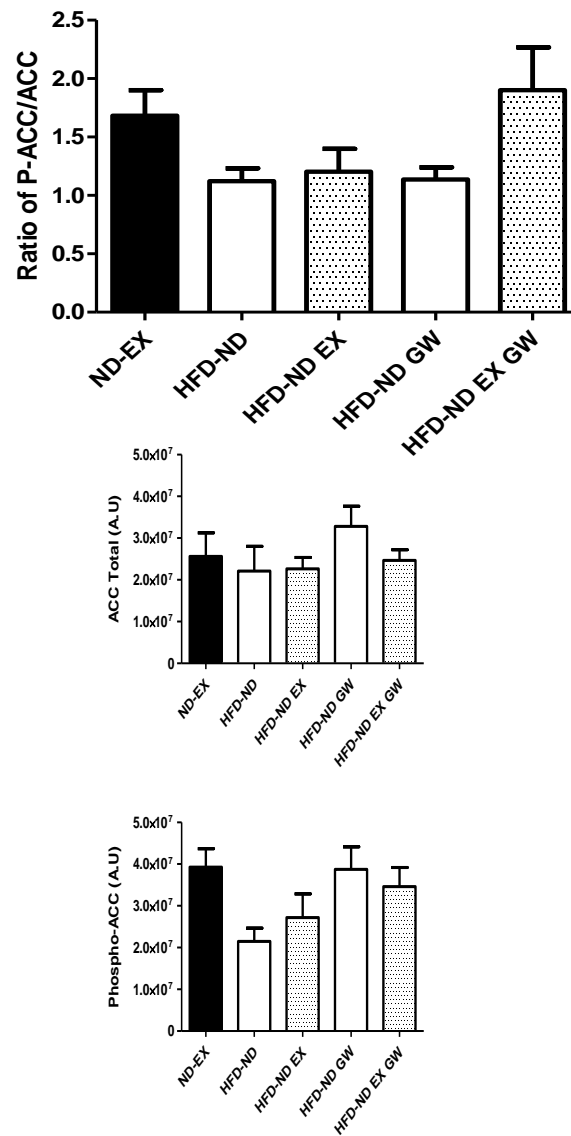

Figure 1. Phosphorylated (Ser79) ACC (P-ACC), total ACC and P-ACC to ACC protein concentrations ratio measured by Western-Blot in *vastus lateralis*.

Data are expressed as mean  $\pm$  s.d.

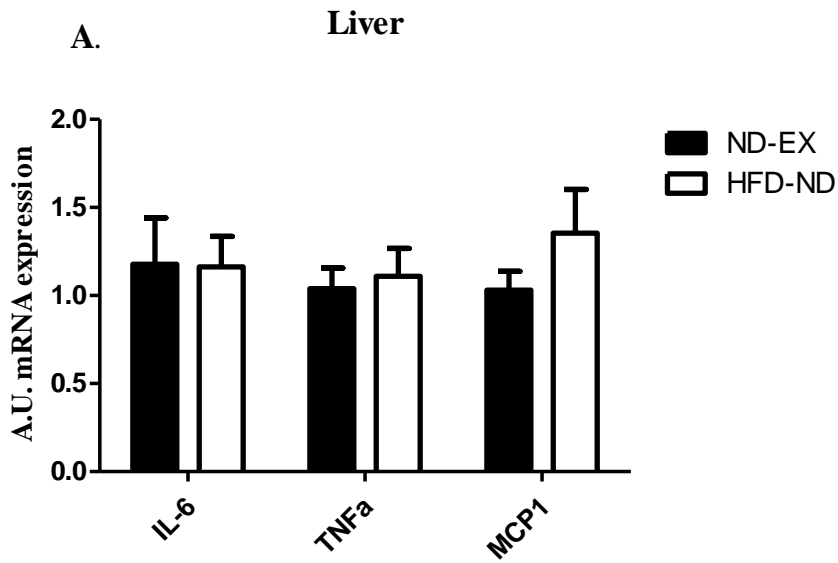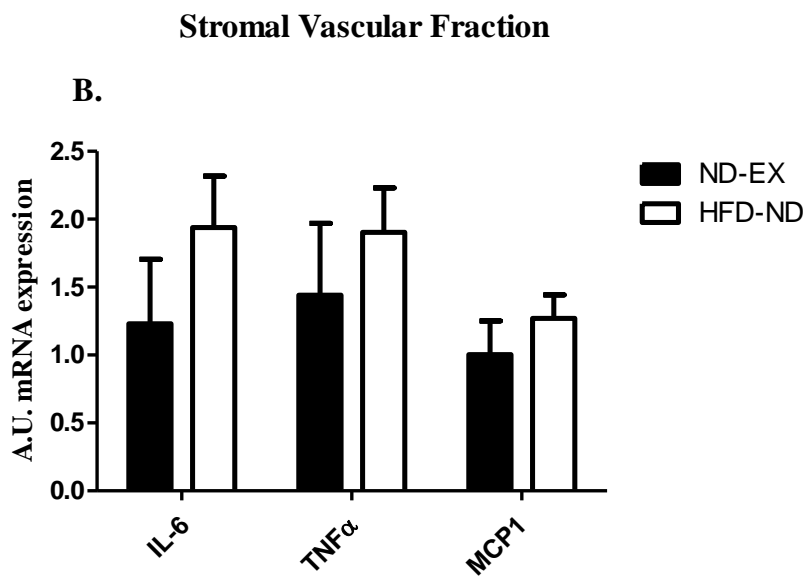

**Figure S2: Pro-inflammatory cytokines mRNA levels in liver and stromal vascular fraction.**

*IL-6*, *TNF- $\alpha$*  and *MCP-1* mRNA levels were determined in female mice exposed to a 12-wk HFD and returning to a Normal Diet (HFD-ND) with or without concomitant treatment (HFD-

ND-EX; HFD-ND-GW; HFD-ND-EX-GW). Expression is relative to *36B4*. Data are shown:

A) in the liver and B) in the stromal vascular fraction. Data are expressed as mean  $\pm$  s.d.

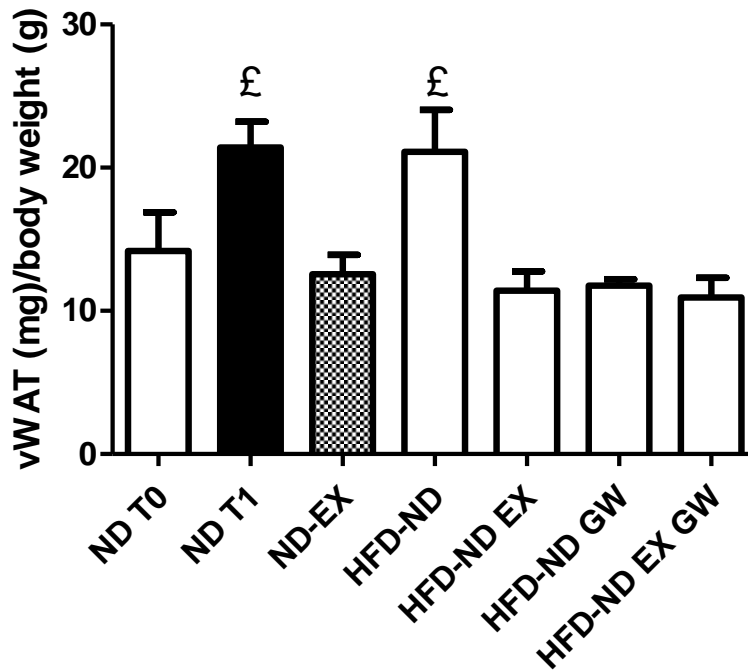

**Figure S3: Visceral adipose tissue mass according to treatment groups.**

Visceral white adipose tissue (vWAT) mass relative to body weight in all groups before (ND (T0)) and after treatments (ND (T1); ND-EX; HFD-ND; HFD-ND-EX; HFD-ND-GW; HFD-ND-EX-GW). Visceral WAT is expressed in milligram (mg) of tissue per gram of body weight.

Data are expressed as mean  $\pm$  s.d; £ $p < 0.05$  vs other groups.

**Table S1: Luminex analysis of pro-inflammatory cytokines in plasma.**

| Results: pg/ml      | IFN-gamma       | IL1-beta        | IL-6            | IL-10           | TNF-alpha       |
|---------------------|-----------------|-----------------|-----------------|-----------------|-----------------|
| <b>ND-EX</b>        | Und             | Und             | 14.6 $\pm$ 9.9  | Und             | Und             |
| <b>HFD-ND</b>       | 2.67 $\pm$ 0.98 | 22.3 $\pm$ 38.8 | 29.0 $\pm$ 48.8 | 6.11 $\pm$ 7.01 | 7.98 $\pm$ 8.68 |
| <b>HFD-ND EX</b>    | Und             | 48.0 $\pm$ 39.9 | 70.1 $\pm$ 53.6 | 34.7 $\pm$ 35.6 | 18.9 $\pm$ 3.99 |
| <b>HFD-ND GW</b>    | Und             | 16.7 $\pm$ 6.31 | 23.0 $\pm$ 20.4 | 5.95 $\pm$ 4.63 | 7.44 $\pm$ 2.38 |
| <b>HFD-ND EX GW</b> | Und             | Und             | 14.7 $\pm$ 12.3 | 4.14 $\pm$ 4.7  | Und             |

Und: Undetermined
